# Supplementary material for: The effect of topical administration of simvastatin on entochondrostosis and intramembranous ossification: An animal experiment
Source: PubMed Central journal article supplement — J Orthop Translat. 2021 Jan 27;28:1–9. doi: 10.1016/j.jot.2020.11.009 (PMC7844440; doi:10.1016/j.jot.2020.11.009), 2021-01-27

Peking University Third Hospital Animal Experiment Ethics  
Committee

# Ethic Approval

Permit No.: 2009-0006(2)

Project title: Effect of topical administration of simvastatin on repairment of animal bone defect.

Principle investigator: Chunli Song

Host for the project: Peking university third hospital

Source of funding:  Government  Foundation  Company

International organization  Other

Decision:

With completion of all required procedures and study designs, the application for ethic approval has been:

granted, the project is permitted to proceed accordingly

halted for revision to be submitted to the ethic committee

Peking University Third Hospital Animal Experiment Ethics Committee

Stamp

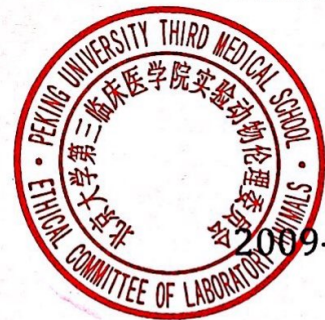

2009-5-22

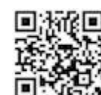

Supplement: mmc1.pdf [file mmc1.pdf]
